# Supplementary material for: A bottom-up emission estimate for the 2022 Nord Stream gas leak: derivation, simulations, and evaluation
Source: Copernicus journal article supplement (doi:10.5194/acp-24-4675-2024), 2024-04-19
Supplement: Supplementary file 1 [file acp-24-4675-2024-supplement.zip]

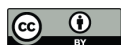

## *Supplement of*

# **A bottom-up emission estimate for the 2022 Nord Stream gas leak: derivation, simulations, and evaluation**

**Rostislav Kouznetsov et al.**

*Correspondence to:* Rostislav Kouznetsov (rostislav.kouznetsov@fmi.fi)

- acp-24-4675-2024-supplement-title-page.pdf
- Supplementary
  - 00README
  - FRP\_HRb.log.gz
  - GasLeak
    - \* Gasleak.py
  - SILAM\_emission\_source
    - \* NordStreamSource0010m.src
    - \* NordStreamSource0050m.src
    - \* NordStreamSource0150m.src
    - \* NordStreamSource0500m.src
    - \* NordStreamSource1500m.src
    - \* NordStreamSource5000m.src
    - \* NordStreamSourceFRP.src
  - Supplementary.pdf
  - Timeseries
    - \* CSV
    - \* NC

The copyright of individual parts of the supplement might differ from the article licence.
